Running head: SEQUENTIAL EFFECT IN OCULOMOTOR INHIBITION

## **Sequential effect and temporal orienting in pre-stimulus oculomotor inhibition**

Noam Tal-Perry<sup>1,2</sup> & Shlomit Yuval-Greenberg<sup>1,3</sup>

<sup>1</sup>School of Psychological Sciences, Tel Aviv University, Tel Aviv, Israel

<sup>2</sup>Department of Experimental Psychology, University of Oxford, Oxford, United Kingdom

<sup>3</sup>Sagol School of Neuroscience, Tel Aviv University, Tel Aviv, Israel

Noam Tal-Perry  <https://orcid.org/0000-0003-2521-9546>

Shlomit Yuval-Greenberg  <https://orcid.org/0000-0001-6455-7578>

Correspondence concerning this article should be addressed to Shlomit Yuval-Greenberg, School of Psychological Sciences and Sagol School of Neuroscience, Tel-Aviv University, P.O. box 39040, Tel Aviv 6997801. Email: [shlomitgr@tau.ac.il](mailto:shlomitgr@tau.ac.il). This study was funded by the Israel Science Foundation grant 1960/19 to S.Y-G.

1  
2  
3  
4  
5  
6  
7  
8  
9  
10  
11  
12  
13  
14  
15  
16  
17

### Abstract

When faced with unfamiliar circumstances, we often turn to our past experiences with similar situations to shape our expectations. This results in the well-established sequential effect, in which previous trials influence the expectations of the current trial. Studies have revealed that, in addition to the classical behavioral metrics, the inhibition of eye movement could be used as a biomarker to study temporal expectations. This pre-stimulus oculomotor inhibition is found a few hundred milliseconds prior to predictable events, with a stronger inhibition for predictable than unpredictable events. The phenomenon has been found to occur in various temporal structures, such as rhythms, cue-association and conditional probability, yet it is still unknown whether it reflects local sequential information of the previous trial. To explore this, we examined the relationship between the sequential effect and the pre-stimulus oculomotor inhibition. Our results (N=40) revealed that inhibition was weaker when the previous trial was longer than the current trial, in line with findings of behavioral metrics. These findings indicate that the pre-stimulus oculomotor inhibition covaries with expectation based on local sequential information, demonstrating the tight connection between this phenomenon and expectation and providing a novel measurement for studying sequential effects in temporal expectation.

*Keywords:* Temporal expectation; Temporal attention; Temporal orientation; Microsaccades; Fixational saccades

20  
21  
22  
23  
24  
25  
26  
27  
28  
29

### Introduction

Our day-to-day life is full of temporal uncertainty. We find ourselves asking, when will the next bus arrive? How long do I need to stand in the queue? When is my manuscript expected to be back from review? To guide our behavior through this uncertainty, e.g., to decide whether we should take a cab, switch to another queue, or contact our editor, we form temporal predictions regarding the likely onset time of expected events (Nobre & van Ede, 2018). The formation of temporal expectations can be based on different sources of information, i.e., temporal priors, such as associations with an informative cue (Amit et al., 2019; Coull et al., 2000; Miniussi et al., 1999) or prior statistical knowledge (Tal-Perry & Yuval-Greenberg, 2022). One such source of information is our recent experience, acquired through previous recent encounters with similar

30 events. This form of temporal expectation is often called *sequential effects* – the expectation that  
31 the timing of the present event will resemble that of the previous one.

32 Sequential effects in the temporal domain are mostly studied using reaction time (RT)  
33 measurements (Capizzi et al., 2015; Possamai et al., 1973; Steinborn & Langner, 2012; Tal-Perry  
34 & Yuval-Greenberg, 2022). The typical trial design of these studies includes a warning signal  
35 followed, after a varying interval called a *foreperiod*, with a target. A common finding in this field  
36 is that when the foreperiod of one trial is shorter than its precedent, perceptual decisions regarding  
37 the present target will be slower. This was interpreted as reflecting the expectation that the duration  
38 of the present foreperiod will resemble that of the previous one. However, the opposite effect does  
39 not always occur, i.e., when the foreperiod of the present trial is longer than the precedent trial is,  
40 RTs remain unchanged relative to when the two trials have the same foreperiod (Niemi &  
41 Näätänen, 1981; Tal-Perry & Yuval-Greenberg, 2022).

42 While RT provides a useful behavioral measurement of temporal expectation, it measures  
43 temporal expectations, by definition, retrospectively, after the event has already occurred and  
44 expectations have already been formed. In a series of studies, we have shown that saccade rate can  
45 be used as a marker of temporal expectation, termed *the pre-target oculomotor inhibition effect*,  
46 which can be measured while expectations are formed rather than retrospectively. The pre-target  
47 oculomotor inhibition effect is a reduction in the rate of eye movements which occurs a few  
48 hundred milliseconds prior to the appearance of a predictable, relative to an unpredictable, target  
49 (Abeles et al., 2020; Amit et al., 2019; Badde et al., 2020; Dankner et al., 2017; Tal-Perry & Yuval-  
50 Greenberg, 2020, 2021).

51 The inhibition of eye movements during the foreperiod joins a host of other evidence  
52 pointing to the crucial role inhibition plays in many forms of temporal expectation, including  
53 sequential effects (Los, 2013). Transcranial magnetic stimulation (TMS) studies in human  
54 participants have shown that during motor response preparation, the motor-evoked potentials of  
55 both task-relevant and task-irrelevant muscles are inhibited prior to the anticipated target onset,  
56 indicating that corticospinal excitability is suppressed in order to prevent premature response  
57 (Duque & Ivry, 2009), which functionally may help to improve the signal-to-noise ratio at the  
58 moment a response is required (Greenhouse et al., 2015). Invasive measures in animals likewise  
59 indicate a pre-movement global inhibition of the musculatory system (e.g., Prut & Fetz, 1999), and  
60 it is evident that interfering with these inhibitory processes impairs timely response execution

61 (Narayanan et al., 2006). As previously discussed (Tal-Perry & Yuval-Greenberg, 2021), this  
62 preparatory global inhibition of the motor system may spread to the oculomotor system, resulting  
63 in the inhibition of eye movements prior to expected stimuli.

64 The oculomotor inhibition effect was shown to be modulated by various types of temporal  
65 expectations, including those driven by rhythm (Dankner et al., 2017), by associations between a  
66 cue and a target, and by hazard rate – the change in the conditional probability for target occurrence  
67 that changes when times passes by and the target has not yet appeared (Amit et al., 2019; Tal-Perry  
68 & Yuval-Greenberg, 2020). However, to date, it remains unknown whether the pre-stimulus  
69 oculomotor inhibition marker is modulated solely by global temporal orienting or also by local  
70 sequential information, i.e., temporal predictions induced by the recent previous trials. Finding a  
71 link between sequential effects and the oculomotor inhibition effect would provide supporting  
72 evidence for a link between oculomotor inhibition and the preparatory inhibition observed in  
73 previous studies. Furthermore, it would indicate that this marker is associated with the formation  
74 of temporal expectations based on recent previous experiences. Such a finding would lend further  
75 support to the validity of this index as a measurement of temporal expectations and provide a novel  
76 metric for studying the effect of local sequential information.

77 In this study, we examined the links between oculomotor inhibition, the sequential effects,  
78 and temporal orienting in two experiments. In Experiment 1 ( $N=40$ ), we examined saccade rate as  
79 a function of the difference between the foreperiod of one trial and that of its precedent trial. We  
80 hypothesized that local sequential information is reflected in eye movements dynamics – that when  
81 the foreperiod of a given trial is shorter than that of its precedent, there would be less pre-target  
82 oculomotor inhibition (i.e., more pre-target saccades) relative to when it was longer or equal. Our  
83 findings confirmed this hypothesis, with the sequential effect on saccade inhibition paralleling the  
84 pattern usually reported for RTs in previous studies. In Experiment 2 ( $N=40$ ) we examined whether  
85 this first-order oculomotor sequential effect could provide an alternative interpretation to our  
86 previous findings of the pre-target oculomotor inhibition effect. This study joins previous studies  
87 by showing that the pre-stimulus oculomotor inhibition covaries with temporal expectation of  
88 various temporal priors and modalities, supporting its validity as an index for the formation of  
89 temporal expectations. Both experiments include new analyses of previously published datasets  
90 (Amit et al., 2019; Tal-Perry & Yuval-Greenberg, 2020, 2022). The previous studies either did not  
91 include an eye tracking analysis (Experiment 1) or did not include analysis of sequential effects

92 (Experiment 2). Notably, here, as in our previous studies on the oculomotor inhibition effect  
93 (Abeles et al., 2020; Amit et al., 2019; Tal-Perry & Yuval-Greenberg, 2020, 2021), we use the  
94 general term “saccades” to include both large saccades and miniature saccades performed during  
95 fixation, which fit the definition of ‘microsaccades’ (Martinez-Conde et al., 2004, 2009). With this  
96 decision, we rely on the common view that saccades and microsaccades constitute an oculomotor  
97 continuum, both activated by similar neural mechanisms and sharing similar functions (Otero-  
98 Millan et al., 2008, 2013). The findings are similar when only small saccades (<1 visual degree)  
99 are included (see **Supplementary Material S1**).

## 100 **Methods**

### 101 **Participants**

102 A total of 80 participants were included in the study: 40 participants were included in Experiment  
103 1 (25 females, 3 left-handed, Mean age  $24.95 \pm 3.82$  standard deviations [SD]) and 40 participants  
104 in Experiment 2 (24 females, one left-handed, Mean age  $22.55 \pm 3.12$  SD). All participants were  
105 healthy, reported normal or corrected-to-normal vision, and reported no history of neurological or  
106 psychiatric disorders. Participants received payment or course credit for their participation. The  
107 experimental protocols were approved by the ethics committees of Tel-Aviv University and the  
108 School of Psychological Sciences. Prior to participation, participants signed informed consent  
109 forms. The present study includes two experiments that are based on reanalyses of three published  
110 data sets as follows: Exp. 1 consisted of a novel analysis of eye tracking data of participants who  
111 were originally included in Tal-Perry & Yuval-Greenberg (2022), but no eye tracking analysis was  
112 performed in the original study; Exp. 2 consisted of a reanalysis of the eye tracking data of datasets  
113 published originally in Amit et al. (2019) and Tal-Perry & Yuval-Greenberg (2020).

### 114 **Stimuli**

115 *Experiment 1.* The fixation object consisted of a dot ( $0.075^\circ$  radius) within a ring ( $0.15^\circ$   
116 radius), embedded within a diamond shape ( $0.4 \times 0.4^\circ$ ). The edges of the diamond changed color  
117 from black to white, cueing attention to the left (two left edges became white) or right (two right  
118 edges became white) side of the fixation object, or remaining neutral with respect to the target  
119 location (all four edges became white). The target was a black asterisk ( $0.4 \times 0.4^\circ$ ) presented at  $4^\circ$   
120 eccentricity to the right or left of the fixation object. A 1000 Hz pure tone was played for 60 ms as

121 negative feedback following errors. Fixation objects and targets were presented on a mid-gray  
122 background.

123 *Experiment 2.* The fixation object in this experiment was a cross (black or blue,  $0.4^\circ \times$   
124  $0.4^\circ$ ), and the target was a Gabor grating patch ( $2^\circ$  diameter, 30% contrast, spatial frequency of 5  
125 cycles/degree) slightly tilted clockwise (CW) or counter-clockwise (CCW) from vertical, with tilt  
126 degree determined individually via 1-up 3-down staircase procedure. All stimuli were displayed  
127 at screen center on a mid-gray background.

## 128 **Procedure**

129 The datasets that we have used originated from three previously published studies. Exp. 1 was  
130 based on the dataset reported in Tal-Perry & Yuval-Greenberg (2022). Exp. 2 was based on the  
131 combined datasets of Amit et al., (2019) and part of the dataset of Tal-Perry & Yuval-Greenberg  
132 (2020), both based on identical procedures.

133 *General procedure.* In both experiments, participants were seated in a dimly lit room, with  
134 a computer monitor placed 100 cm in front of them (24" LCD ASUS VG248QE,  $1,920 \times 1,080$   
135 pixels resolution, 120 Hz refresh rate, mid-gray luminance was measured to be  $110 \text{ cd/m}^2$ ). During  
136 the session, participants rested their heads on a chinrest. MATLAB R2015a (Mathworks, USA)  
137 was used to code and control the experiment, with stimuli displayed using Psychophysics Toolbox  
138 v3 (Brainard, 1997).

139 *Experiment 1.* Each trial started with a central black fixation object, presented until an  
140 online gaze-contingent procedure verified 1000 ms of stable fixation, defined by the placement of  
141 gaze within a radius of  $1.5^\circ$  of screen center. Following this, the edges of the fixation object  
142 changed color for 200 ms to represent a spatial cue (right or left in 75% of trials or neutral in the  
143 remaining 25% of trials). After a varying foreperiod (500 / 900 / 1300 / 1700 / 2100 ms) the target  
144 was briefly (33 ms) presented at  $4^\circ$  eccentricity to the left or right of the screen center, with the  
145 cue being valid with the target location in 75% of informative trials. Participants were instructed  
146 to respond as fast as possible upon detecting the target via a single button press. Between groups,  
147 participants were presented with the five foreperiods in either a uniform distribution (20%  
148 probability for each foreperiod) or an inverse-U-shaped distribution (a ratio of 1:2:3:2:1 between  
149 the five foreperiods, leading to trial percentages of approximately 11%, 22%, 33%, 22%, and 11%,  
150 respectively). Fixation was monitored throughout the foreperiod, using an online gaze-contingent

## SEQUENTIAL EFFECT IN OCULOMOTOR INHIBITION

6

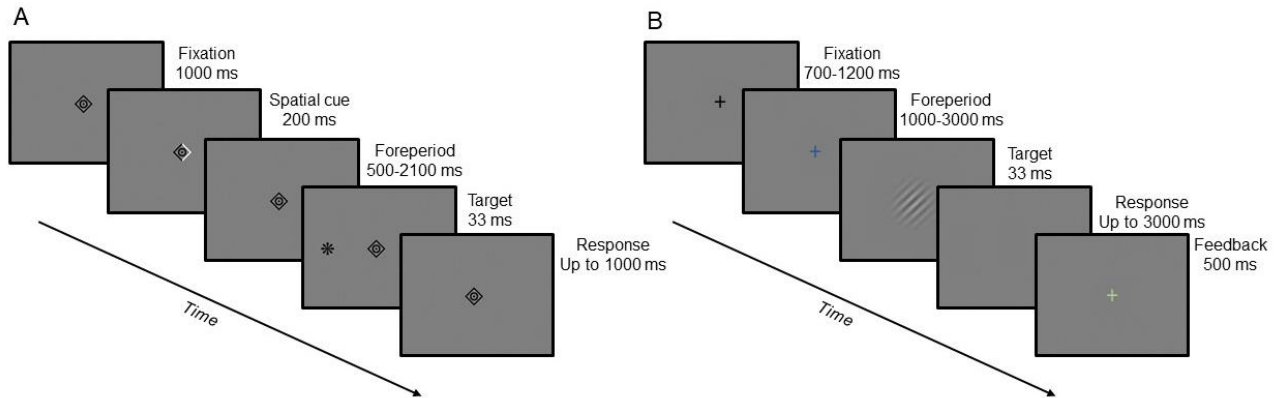

**Figure 1** Trial progression. (A) Trial progression for Exp. 1, adapted from Tal-Perry & Yuval-Greenberg (2022); (B) Trial progression for Exp. 2, adapted from Tal-Perry & Yuval-Greenberg (2020), which was identical to the trial progression used in Amit et al. (2019).

151 procedure, and trials that included  $\geq 1.5^\circ$  gaze-shift for more than 10 ms during this period were  
152 aborted and repeated at a later stage of the session. An error feedback tone was played when  
153 participants responded before the target onset or did not respond within 1000 ms following the  
154 target onset. These trials were not included in the analysis. Participants of the uniform distribution  
155 group (N=20) performed 10 blocks of 160 trials each, divided into two sessions. Participants of  
156 the inverse-U-shaped distribution group (N=20) performed 18 blocks of 144 trials each, divided  
157 into three sessions done on separate days. A short break was given after each block. A practice  
158 block of 10 trials with random conditions was administered at the beginning of each session.  
159 **Figure 1A** summarizes the trial procedure used in this experiment.

160 *Experiment 2.* A central black fixation cross was presented between trials for a jittered  
161 inter-trial interval of 700-1200 ms. At trial onset, the fixation cross changed color from black to  
162 blue marking the onset of the foreperiod interval. After the foreperiod had elapsed, the target (tilted  
163 Gabor patch) was briefly (33 ms) presented and followed by a blank screen, and participants were  
164 requested to perform a 2AFC discrimination on the Gabor tilt by pressing one of two keyboard  
165 keys. Foreperiod was set to be between 1000-3000 ms in 500 ms increments. In fixed blocks,  
166 foreperiod was constant throughout the block. In random blocks, the foreperiod randomly varied  
167 from trial to trial, with foreperiods uniformly distributed. In part of the dataset (originally  
168 published in Amit et al., 2019), participants completed a total of five fixed blocks (one of each  
169 foreperiod) and five random blocks, with 100 trials per block. In the rest of the dataset (originally  
170 published in Tal-Perry & Yuval-Greenberg, 2020), participants completed two fixed blocks (one

171 of 1000 ms and one of 2000 ms), and five random blocks, with 80 trials per block. Ten additional  
172 blocks performed by the participants in Tal-Perry & Yuval-Greenberg (five blocks with a  
173 distribution of 80% 1000 ms foreperiods and 20% 2000 ms foreperiods, and five blocks with the  
174 opposite ratio) were not included in the present study. The collapsed datasets of the two original  
175 studies were imbalanced in their number of trials per condition: there were 500 random trials and  
176 500 fixed trials of five different foreperiods per participant in Amit et al. and there were 400  
177 random trials and 160 fixed trials of two different foreperiods per participant in Tal-Perry & Yuval-  
178 Greenberg. This imbalance was accounted for by the generalized linear mixed model analysis  
179 which takes into account trial-wise variance (see Statistical analysis). **Figure 1B** summarizes the  
180 trial procedure used in this experiment.

### 181 **Eye-tracking**

182 Eye movements were monitored using EyeLink 1000 Plus infrared video-oculographic desktop  
183 mounted system (SR Research Ltd., Oakville, ON, Canada), with a 1000 Hz sampling rate and the  
184 standard online and offline analog filters provided by EyeLink (Stampe, 1993). A nine-point  
185 calibration was performed at the beginning of the experiment and when necessary. Raw gaze data  
186 was low-pass filtered at 60 Hz and segmented between -500 ms relative to cue onset and 500 ms  
187 relative to target onset. Blinks were detected based on the built-in algorithm provided by EyeLink,  
188 plus an additional criterion requiring a binocular change in pupil size that exceeded 2.5 standard  
189 deviations from the segment's mean pupil size for 3 or more consecutive samples (Hershman et  
190 al., 2018). Saccades were detected using a published algorithm (Engbert & Kliegl, 2003; Engbert  
191 & Mergenthaler, 2006), with saccade onset defined as the point in which the absolute standardized  
192 eye velocity exceeded the segment's median eye velocity by six or more standard deviations, for a  
193 minimum of six consecutive samples. Only binocular saccades were included in the analysis. A 50  
194 ms interval between saccade offset and the next saccade onset was imposed to prevent detection  
195 of overshoots. Intervals with blinks and 200 ms before the onset of blinks and after their offsets,  
196 were excluded from the saccades analysis. The analysis included saccades of all sizes, although  
197 most saccades (91.12%) were minuscule ( $<1^\circ$ ) due to the instruction to maintain fixation, and thus  
198 fit the definition of microsaccades (Martinez-Conde et al., 2009). Correlation between saccade  
199 amplitude and peak velocity (main sequence, Zuber et al., 1965) was high ( $r > 0.9$ ) for all  
200 participants, verifying the validity of the saccade detection procedure.



201 For each trial, we determined whether a saccade was detected in the period of -300 to 0 ms  
202 relative to the target onset. This range was based on the time period known to include the  
203 oculomotor inhibition effect as reported in Tal-Perry & Yuval-Greenberg (2021). Trials that  
204 included a blink or missing data during this period were discarded from the analysis.

### 205 **Statistical analysis**

206 *Experiment 1.* For each trial, we calculated the difference between its foreperiod and the  
207 foreperiod of the previous trial (FP-difference,  $FP_n - FP_{n-1}$ ). For this purpose, the first trial of  
208 each session was discarded from the analysis. The resulting continuous factor ranged between -  
209 1600 and 1600 ms in 400 ms increments and was Z-scaled to reduce computational complexity  
210 (standardized foreperiod difference, SFD). The probability of a saccade onset in the pre-target time  
211 interval was then analyzed using a generalized linear mixed model (GLMM), assuming a binomial  
212 family of responses (saccade present / absent) with a logit link, i.e., a logistic mixed model. We  
213 based our choice of the model on the assumption that due to pre-stimulus oculomotor inhibition,  
214 in the vast majority of trials, we are not expecting more than a single saccade to occur in the  
215 analyzed duration, with trials deviating from this assumption being rare and of little impact on the  
216 overall results. The following fixed factors were included in the model: (1) a scaled linear and  
217 quadratic relation between the current and previous foreperiod (SFD), to model the sequential  
218 effect; (2) the foreperiod distribution (uniform / inverse-U-shaped), a between-subject factor, using  
219 sum contrasts; (3) The interaction between the two factors, to model the effect of foreperiod  
220 distribution on the sequential effect. As oculomotor behavior was examined prior to target onset,  
221 the trial's spatial cueing condition used in the original experiment (valid / invalid / neutral) was  
222 not included as a factor.

223 *Experiment 2.* Trials of the random block were screened according to the foreperiod of the  
224 previous trial, such that only trials in which the previous foreperiod was equal to the current trial's  
225 foreperiod were included in the analysis. The probability of a saccade onset was then analyzed  
226 using a logistic mixed model, with the following factors: (1) the current trial's foreperiod; (2)  
227 condition (fixed / random); and (3) the interaction between the two factors. Difference contrast  
228 was used for Foreperiod, and sum contrast was used for Condition.

229 *General statistical analysis.* For all models, statistical significance for main effects and  
230 interactions was determined via a likelihood-ratio (LR) test against a reduced nested model  
231 excluding the fixed term (i.e., type-II sum of squares, SS), and statistical significance for parameter

232 coefficients was determined according to Wald z-test (Fox, 2016). To provide support for null  
233 results ( $p > 0.05$ ), we additionally calculated the Bayes Factor (BF) between the full and reduced  
234 model, using BIC approximation (Wagenmakers, 2007). BF is reported with the null result in the  
235 denominator ( $BF_{01}$ ), representing how much the data is supported by the null model relative to the  
236 full model. The model's random effect structure was selected according to the model that was  
237 found to be most parsimonious with the data, i.e., the fullest model that the data permits while still  
238 converging with no singular estimates (Bates, Kliegl, et al., 2015), in order to balance between  
239 type-I error and statistical power (Matuschek et al., 2017). This was achieved by starting with a  
240 random intercept by subject-only model and continuing to a model with random slopes for fixed  
241 terms by subject and their correlation parameters, and from there to a random-interaction-slopes  
242 by-subject model, testing for model convergences in each step. Models that failed to converge  
243 were trimmed by the random slope with the least explained variance and were retested. Analyses  
244 were performed in R v4.0.3 using R-studio v1.3.959 (R Core Team, 2018). Modelling was  
245 performed using the lme4 (Bates, Mächler, et al., 2015) package, BF was calculated using the  
246 BayesFactor package (Morey & Rouder, 2018), and model diagnostics were performed using the  
247 performance package (Lüdtke et al., 2020). An R-markdown file describing all the model fitting  
248 steps and diagnostic checks on the final model is available at the project's OSF repository (see  
249 Data Availability Statement)

## 250 Results

### 251 Experiment 1: the oculomotor sequential effect

252 In the first experiment, we tested whether the pre-stimulus oculomotor inhibition is affected by  
253 contextual information about the previous trial in a speeded detection task. For this goal, we  
254 analyzed the eye movement data from Tal-Perry & Yuval-Greenberg (2022). We first start by  
255 examining the behavioral sequential effect in the same dataset.

256 *Reaction times.* Participants' mean reaction times (RTs) were reported in a previous  
257 publication (Tal-Perry & Yuval-Greenberg, 2022) and are summarized here. After discarding trials  
258 with no previous foreperiod, trials with no response, and trials in which a response occurred within  
259 less than 150 ms relative to target onset, the RTs of the remaining trials were modeled as a factor  
260 of the Standardized Foreperiod Difference between the current and the preceding trial (SFD,  
261 continuous; linear and quadratic terms), Foreperiod Distribution (uniform / inverse-U-shaped),  
262 Condition (valid / invalid / neutral), and their interaction terms. Results for the valid condition are

263 displayed in **Figure 2A**. Findings revealed a strong sequential effect, such that RT was slower in  
264 trials that were preceded by a longer trial, while the opposite was not found. This effect was  
265 modulated by the Foreperiod Distribution, but not by Condition. These results confirm that a  
266 behavioral sequential effect was present in the analyzed dataset.

267 *Eye tracking.* The probability of a saccade occurring prior to target onset was examined  
268 using a logistic mixed model, with SFD (continuous; linear and quadratic terms), Foreperiod  
269 Distribution (uniform / inverse-U-shaped), and the interaction between them set as fixed factors,  
270 allowing for a random intercept per subject and a random slope to SFD per subject.

271 The saccade probability for each distribution as a factor of the standardized difference  
272 between the current and previous foreperiod is displayed in **Figure 2B**. Consistently with the RT  
273 findings, results showed that SFD had a strong influence on saccade likelihood ( $\chi^2(2) = 30.225$ ,  $p$   
274  $< .001$ ), with a strong negative linear slope (log estimate  $-0.238$ ,  $z = -6.061$ ,  $p < .001$ ), indicating  
275 that saccade probability is reduced as the difference between the current and previous trial  
276 gradually turns from being negative (previous is longer) to positive (previous is shorter). This  
277 indicates that oculomotor inhibition is enhanced when the previous trial becomes shorter relative  
278 to the current trial. This negative slope was accompanied by a weaker positive quadratic slope (log  
279 estimate  $0.081$ ,  $z = 4.483$ ,  $p < .001$ ), reflecting that the degree of saccade inhibition is gradually  
280 decreased until it changes direction. The combination of the negative linear and the positive  
281 quadratic trends resulted in the asymmetry between negative and positive SFD observed.

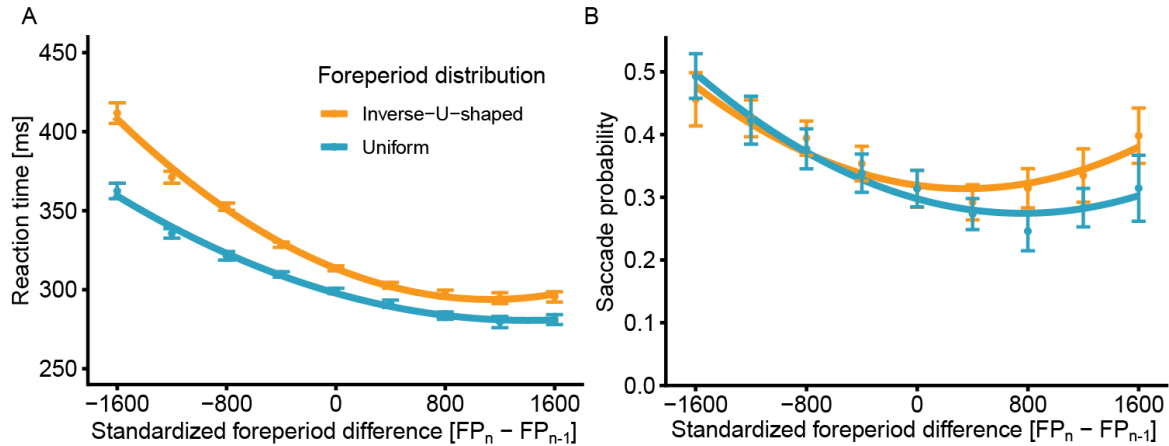

**Figure 2** *Experiment 1 results.* Reaction time in valid cue trials (A) and the probability of performing a saccade during the -300 to 0 ms period relative to target onset (B), as a function of the difference between the current and previous foreperiod, and the Foreperiod Distribution. Negative values indicate that previous foreperiod was longer than current foreperiod, and vice-versa for positive values. Error bars depict  $\pm 1$  standard error from the mean, correcting for within-subject variability (Cousineau & O'Brien, 2014). Lines depict 2<sup>nd</sup> polynomial fit to the observed data.  $N = 20$  in each distribution.

282 To examine this gradual change, we modeled SFD as a categorical factor and contrasted  
283 each level with an SFD of zero (i.e., previous foreperiod equals current; see **Table 1**). As can be  
284 observed, the negative SFDs (longer foreperiod at previous trial) resulted in higher saccade  
285 probability compared to the zero SFD (no difference in foreperiod between this and the previous  
286 trial), with a gradual decrease in saccade probability difference as the SFD decreases. The positive  
287 SFDs (shorter foreperiod at previous trial) resulted in a significantly smaller saccade probability  
288 for the 400 and 800 ms difference relative to the zero SFD, with the effect gradually decreasing as  
289 the SFD increases, such that no significant difference was observed for the larger positive SFD  
290 values. These findings are consistent with the hypothesis that oculomotor inhibition reflects  
291 anticipation – in negative SFD trials, participants are anticipating the target to occur at a later stage  
292 of the trial, thus there is a weaker inhibition of saccades prior to the actual target onset as compared  
293 to trials where the target appeared at the expected time. Assuming the participants have learned  
294 the distribution of foreperiods, reduced saccade rate observed in the first two positive SFD levels  
295 may reflect the effect of conditional probability (hazard rate) – as target was expected to appear  
296 but has yet to appear, anticipation continues to be built up, and with it, the inhibition of saccades  
297 continues to increase; or it may reflect the aggregated effect of earlier foreperiods, i.e., higher-  
298 order sequential effects. Lastly, the lack of significant difference in the last two positive SFD levels

| SFD          | Log difference [95% CI] | z-ratio | FDR-corrected <i>p</i> |
|--------------|-------------------------|---------|------------------------|
| <b>-1600</b> | 0.796 [0.634 0.958]     | 13.107  | < .001                 |
| <b>-1200</b> | 0.562 [0.455 0.669]     | 14.075  | < .001                 |
| <b>-800</b>  | 0.352 [0.263 0.441]     | 10.520  | < .001                 |
| <b>-400</b>  | 0.165 [-0.082 0.248]    | 5.285   | < .001                 |
| <b>400</b>   | -0.169 [-0.258 -0.080]  | -5.073  | < .001                 |
| <b>800</b>   | -0.213 [-0.315 -0.111]  | -5.587  | < .001                 |
| <b>1200</b>  | -0.091 [-0.219 0.037]   | -1.888  | .067                   |
| <b>1600</b>  | 0.091 [-0.157 0.260]    | 0.654   | .513                   |

**Table 1** *SFD from zero level.* The model estimates represent the difference in log-odds saccade probability of [SFD level minus zero level] along with a 95% confidence interval (CI). Reported statistics based on log odds-ratio with the zero SFD level in the denominator. Reported *p* values were false discovery-rate (FDR) corrected. SFD = standardized foreperiod difference

299 may reflect the added time uncertainty in expectation – at these trials, target appeared long after  
300 the expected time, such that anticipating when would it occur became increasingly more difficult.

301 Importantly, the SFD significantly interacted with the Foreperiod Distribution ( $\chi^2(2) =$   
302 17.635,  $p < .001$ ), stemming from both a difference in the linear (log estimate 0.038,  $z = 3.529$ ,  $p$   
303  $< .001$ ) and quadratic (log estimate 0.022,  $z = 2.554$ ,  $p = .011$ ) components between the foreperiod  
304 distributions. To explore this interaction, we contrasted each SFD between distributions (see **Table**  
305 **2**). As can be observed, the two foreperiod distributions significantly differed only for the positive  
306 SFD values starting with 800 ms. Interestingly, this pattern of interaction differed from the one  
307 observed in the RT data (**Figure 2A**), in which the greatest differences between the distributions  
308 were observed for the most negative SFDs, with differences decreasing as SFD got closer to zero  
309 and went into positive values. These diverging patterns may stem from underlying mechanistic  
310 differences between the motor and oculomotor systems. Lastly, we observed a significant effect  
311 for Foreperiod Distribution ( $\chi^2(1) = 23.588$ ,  $p < .001$ ), stemming from the higher probability of  
312 saccade occurrence for the inverse-U-shaped distribution. These results suggest that the pre-  
313 stimulus oculomotor inhibition reflects the combination of short-term expectations from the

314 previous trials and long-term expectations from the distribution of intervals and higher-order  
315 sequential effects.

316

| SFD   | Log difference [95% CI] | z-ratio | FDR-corrected <i>p</i> |
|-------|-------------------------|---------|------------------------|
| -1600 | 0.119 [-0.342 0.103]    | 1.054   | .292                   |
| -1200 | -0.077 [-.055 0.201]    | -1.140  | .254                   |
| -800  | -0.093 [-0.009 0.195]   | -1.792  | .073                   |
| -400  | -0.087 [-0.003 0.178]   | -1.894  | .058                   |
| 0     | -0.030 [-0.057 0.116]   | -0.670  | 0.503                  |
| 400   | -0.078 [-0.023 0.179]   | -1.506  | 0.132                  |
| 800   | -0.334 [-0.209 -0.459]  | -5.244  | <.001                  |
| 1200  | -0.243 [-0.074 -0.411]  | -2.821  | .005                   |
| 1600  | -0.524 [-0.232 -0.815]  | -3.524  | <.001                  |

**Table 2** *SFD contrasts by Foreperiod Distribution.* The model estimates represent the difference in log-odds saccade probability [uniform minus inverse-U-shaped] conditions along with a 95% confidence interval (CI). Reported statistics based on log odds-ratio with uniform distribution in the nominator. Reported *p* values were false discovery-rate (FDR) corrected. SFD = standardized foreperiod difference.

### 317 **Experiment 2: Does the fixed effect stem from the sequential effect?**

318 Previous studies have demonstrated that the pre-stimulus oculomotor inhibition is stronger when  
319 the foreperiod is fixed throughout the block compared to when it varies randomly (Abeles et al.,  
320 2020; Amit et al., 2019; Badde et al., 2020; Dankner et al., 2017; Tal-Perry & Yuval-Greenberg,  
321 2020, 2021). In Exp. 1, we observed that saccades were inhibited to a larger degree when the  
322 previous foreperiod matched the current foreperiod (SFD of zero) compared to when the previous  
323 foreperiod was longer in duration (negative SFD. The opposite was generally true for trials with  
324 shorter previous foreperiod (positive SFD) yet this effect was not symmetrical (see **Figure 2B**) –  
325 compared to previous matched trials, saccade probability only slightly decreased or did not

326 significantly differ (see **Table 1**). This raises the question of whether the fixed vs. random effect  
327 observed in previous studies stemmed from local sequential information rather than from target  
328 probability. In these previous studies, the fixed and random trials were included in different blocks:  
329 in the fixed blocks the previous trial always matched the present trial, i.e., had SFD zero; In  
330 contrast, in the random block, the previous trial could have been longer, equal, or shorter than the  
331 present trial. Since the sequential effect is asymmetrical, averaging trials with positive and negative  
332 SFDs (as in the random condition) is expected to lead to a higher saccade rate than trials of zero  
333 SFD (as in the fixed condition). It could therefore be hypothesized that the sequential effect is at  
334 the basis of the difference in saccade rate between the fixed and random conditions (higher pre-  
335 stimulus saccade rate for random relative to fixed) rather than temporal expectation, as was  
336 previously suggested.

337 To examine this hypothesis, we reexamined the fixed vs. random effect reported in two  
338 previous studies (Amit et al., 2019; Tal-Perry & Yuval-Greenberg, 2020), while controlling for  
339 the previous trial. We compared the probability of performing a saccade prior to target onset  
340 between the fixed and the random trials while including only trials in which the previous foreperiod  
341 was equal to the current foreperiod. Thus, the n-1 identity was matched between the two  
342 conditions. Results were analyzed using a GLMM assuming a binomial family of response, with  
343 Condition (fixed / random), Foreperiod (continuous), and the interaction between them as within-  
344 subject fixed factors, allowing for a random intercept by subject and random slope for each of the  
345 main effects by subject.

346 **Figure 3** depicts the descriptive results of this analysis. As can be observed, we found  
347 saccade probability to be significantly lower in the fixed compared to the random condition ( $\chi^2(1)$   
348 = 6.700,  $p = .01$ ). There was no significant effect for foreperiod ( $\chi^2(1) = 0.916$ ,  $p = .338$ ,  $BF_{01} =$   
349  $77.675$ ), but foreperiod significantly interacted with condition ( $\chi^2(1) = 20.500$ ,  $p < .001$ ), owing  
350 to the positive slope in the fixed condition compared to the negative slope in the random condition.  
351 This reversal in slopes matches what was observed in Amit et al. (2019) – the decrease in  
352 oculomotor inhibition in the fixed condition as foreperiod increases could be explained by the  
353 increase in temporal uncertainty, while the increase in oculomotor inhibition in the random  
354 condition might be the result of the increasing hazard rate, i.e., the likelihood of an event to occur  
355 given that it has yet to occur. Note, however, that the increase in oculomotor inhibition is less steep  
356 than the increase in the hazard rate, questioning this interpretation and suggesting the possible

357 involvement of additional factors. Overall, these results are consistent with those found when not  
358 controlling for the previous trial foreperiod and therefore suggest that the fixed effect observed in  
359 previous studies cannot be explained solely as the result of a sequential effect, but likely reflects  
360 target predictability.

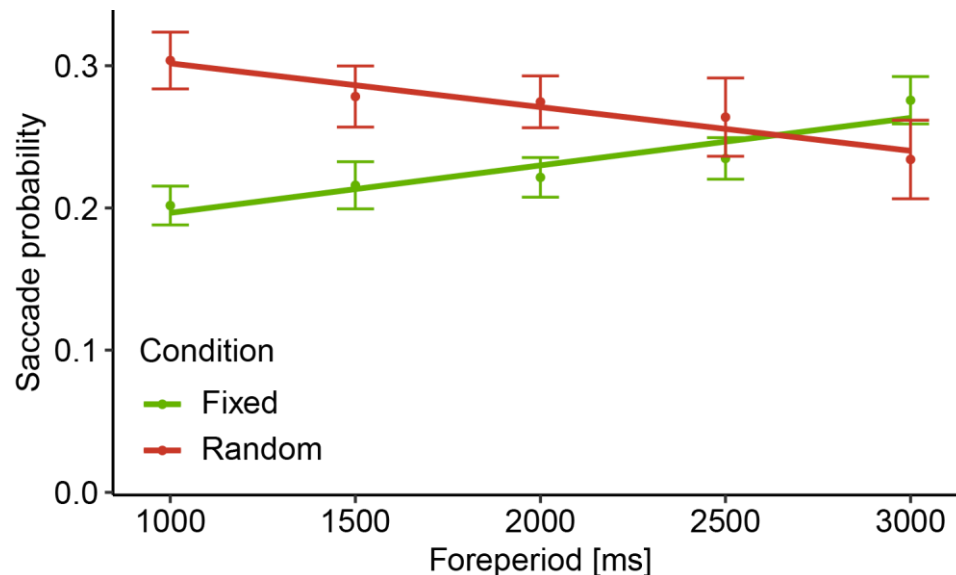

**Figure 3** *Experiment 2 results.* The probability of performing a saccade during the -300 to 0 ms period relative to target onset, as a function of Condition and Foreperiod, with the n-1 trial's foreperiod matching the current trial's foreperiod for both conditions. Error bars depict  $\pm 1$  standard error from the mean, correcting for within-subject variability (Cousineau & O'Brien, 2014). Lines depict linear fit to the observed data.  $N = 40$

361

## Discussion

362 In this study, we examined whether the pre-stimulus oculomotor inhibition is affected by local  
363 sequential information, i.e., the sequential effect – the previous trial history with respect to the  
364 current trial. In Exp. 1, we demonstrated that the likelihood of performing a saccade prior to target  
365 onset changed as a factor of the relation between the current trial's foreperiod and the previous  
366 trial's foreperiod, consistent with the typical pattern observed for RT with respect to the sequential  
367 effect and demonstrating once more that the pre-stimulus oculomotor inhibition reflects  
368 anticipation similarly to RTs.

369 As a follow-up question, in Exp. 2 we examined whether the sequential effect could  
370 provide an alternative explanation to findings observed in previous cue-based temporal expectation  
371 studies. In these studies, we found that when the foreperiod was fixed throughout the block, pre-



372 target saccades were inhibited to a larger degree than when the foreperiod varied within the block,  
373 for short foreperiods (Abeles et al., 2020; Amit et al., 2019; Badde et al., 2020; Dankner et al.,  
374 2017; Tal-Perry & Yuval-Greenberg, 2020, 2021). These findings were interpreted as the result of  
375 a higher expectation as target predictability increased. However, in the fixed block of all these  
376 cases, the previous trial's foreperiod always matched the current trial's foreperiod. Thus, the lower  
377 saccade rate found in the fixed condition could be interpreted as resulting from a sequential effect  
378 of the previous trial. In Exp. 2, we demonstrated that this interpretation is unlikely – trials from  
379 the random condition in which the previous foreperiod matched the current trial's, nevertheless  
380 exhibited a higher saccade rate compared to the fixed condition. These findings are in line with  
381 previous RT studies that showed the FP distribution effects cannot be reduced to sequential effects  
382 (Los & Agter, 2005; Vallesi et al., 2013). Together, these two experiments indicate that oculomotor  
383 inhibition is modulated both by local sequential information and by more global temporal priors,  
384 such as target probability, foreperiod distribution and higher-order sequential effects.

### 385 **Models of the sequential effect**

386 In Exp. 1, we found an asymmetrical sequential effect of pre-target saccade rate: pre-target saccade  
387 rate was higher in trials succeeding trials with longer foreperiod but it was either similar or only  
388 slightly lower in trials succeeding a shorter foreperiod. This asymmetry is consistent with the  
389 asymmetric sequential effect reported previously with RTs: RTs in trials that follow a trial with  
390 longer foreperiod tend to be slower than the RT in trials that follow trials of identical foreperiods,  
391 but the opposite is typically not found (e.g., Los et al., 2001; Steinborn & Langner, 2012; Tal-  
392 Perry & Yuval-Greenberg, 2022; Vallesi & Shallice, 2007). There are a few theories explaining  
393 this asymmetrical pattern in RT data (Los, 2010). We focus here on four of these theories: the  
394 *strategic model* (e.g., Alegria & Delhaye-Rembaux, 1975; Niemi & Näätänen, 1981), the *dual-*  
395 *process model* (Vallesi, 2010; Vallesi et al., 2007; Vallesi & Shallice, 2007), and the *trace-*  
396 *conditioning model* (Los et al., 2001), which was later updated to form the *multiple-trace theory*  
397 (Los et al., 2014, 2017, 2021; Salet et al., 2022). While these models were developed to explain  
398 results in RT data, they may be adapted to interpret the sequential effect observed for the pre-  
399 stimulus oculomotor inhibition in the current study.

400 The *strategic model* (Alegria & Delhaye-Rembaux, 1975; Niemi & Näätänen, 1981) was  
401 an initial attempt at explaining the asymmetrical pattern of the sequential effect. According to this  
402 view, participants use the target onset time in the  $n-1$  trial to orient their attention with regard to

403 target onset in the current trial. If time elapses and the target has failed to occur, participants can  
404 maintain their preparatory state or shift it toward a later moment when target is likely to occur.  
405 Thus, the model predicts RT to be slow when target arrives sooner than anticipated relative to the  
406  $n-1$  trial, yet to remain relatively similar if target occurs at the anticipated moment or after it. This  
407 theory could explain the asymmetrical sequential effect as demonstrated in Exp. 1 as follows:  
408 when the previous foreperiod is shorter than the current foreperiod, participants orient their  
409 expectations toward the short period in the current trial, but given that the event has not occurred,  
410 they reorient their expectations to the next probable target onset, whose conditional probability is  
411 typically higher (e.g., under uniform foreperiod distribution), thus leading to higher expectations  
412 and inhibition of eye movements prior to the next target. However, the strategic model was  
413 criticized for not providing a full explanation of the sequential effects, particularly their influence  
414 in the case of 100% valid cues (Los & Heslenfeld, 2005).

415         The criticism raised against the strategic model led to the development of the *dual-process*  
416 *model* (Vallesi, 2010; Vallesi et al., 2007; Vallesi & Shallice, 2007). According to the dual-process  
417 model, sequential effects stem from two factors: an automatic increase in arousal from the previous  
418 trial target (arousal carry-over), along with a controlled or intentional monitoring of conditional  
419 probability (hazard rate) that varies during the given trial, akin to the description given by the  
420 strategic view. The model posits that the former is the source of the sequential effect, while the  
421 latter is the reason the sequential effect is asymmetrical. The model's identification of the  
422 intentional monitoring with the hazard rate function fits the observed difference in asymmetry  
423 between the two foreperiod distributions in Exp. 1, as different foreperiod distributions lead to  
424 different conditional probabilities. This view is also consistent with our previous studies in which  
425 we have demonstrated other effects of conditional probabilities on patterns of pre-stimulus  
426 oculomotor inhibition (Abeles et al., 2020; Amit et al., 2019; Tal-Perry & Yuval-Greenberg, 2020).  
427 The second process, arousal from the previous trial, affects expectations in the current trial. When  
428 preceded by a short trial, arousal tends to be high, and RT is accordingly fast. When preceded by  
429 a long trial, the prolonged preparation causes exhaustion of alertness, leading to slower RT in the  
430 following trial (Steinborn & Langner, 2012; Vallesi & Shallice, 2007). To provide a similar  
431 explanation in the case of pre-stimulus oculomotor inhibition, one has to assume that arousal or  
432 readiness to respond is positively correlated with oculomotor rate. In a previous study, we showed  
433 that the pre-stimulus oculomotor inhibition is independent of motor readiness (Tal-Perry & Yuval-

434 Greenberg, 2021) and thus response readiness is unlikely to explain the higher saccade  
435 probabilities observed for negative SFD trials (longer previous trial) in Exp. 1 of the present study  
436 (see **Figure 2B**). Thus, the dual-process model falls short of explaining the full pattern of results  
437 in this study. This is consistent with a study by Capizzi et al., (2015), that tested the prediction of  
438 the dual-process models using non-aging distributions with and without catch trials, thereby  
439 controlling for the intentional component postulated by the model. In this scenario, the model  
440 predicts the sequential effect to be symmetrical, yet results of this study showed an asymmetrical  
441 sequential effect. The same study found that these results can be explained by the trace-  
442 conditioning model, which we now turn to discuss.

443 As an alternative, the *trace-conditioning model* (Los et al., 2001) suggests that the  
444 asymmetrical sequential effect is the result of a single process – the activation of the weighted  
445 memory traces of previous trials starting at cue onset, and decaying as time progresses. This model  
446 assumes that each critical moment is associated with a conditioned strength: the higher the  
447 conditioned strength associated with a critical moment the higher expectations will be if the target  
448 occurs at that moment (Los 2010). However, this model posited that the effect of FP distribution  
449 on RT was simply the consequence of the sequential effect, yet the sequential effect was shown to  
450 be inadequate in explaining it (Los & Agter, 2005). It was further shown that the sequential effect  
451 could be manipulated by changing the inter-trial interval while leaving the FP distribution effect  
452 intact (Vallesi et al., 2013), further highlighting that the latter is not a consequence of the former.

453 The trace-conditioning model formed the basis of a more recent model, the *multiple-trace*  
454 *theory* (Los et al., 2014, 2017, 2021; Salet et al., 2022), according to which the onset of the cue in  
455 each trial triggers a motor inhibition which prevents the execution of a premature response during  
456 the foreperiod interval. The target onset activates a second neuronal population to elicit a response.  
457 This pattern of inhibition followed by activation constitutes the preparatory temporal profile,  
458 which is saved as a trace in memory after each trial and can be identified with the expectation  
459 process. At each cue onset, the existing memory traces, accumulated over previous trials, are  
460 reactivated and are aggregated to a preparatory pattern which determines when will inhibition  
461 wane and activation peak within the current trial. Due to the dissipation of memory over time,  
462 recent trials contribute more strongly to the activation than older trials. As the preparatory pattern  
463 is an aggregation of previous trials, different foreperiod distributions are expected to lead to  
464 different preparatory patterns, as the mixture of previous foreperiod (i.e., the higher-order

465 sequential effects) should vary according to distribution. This, in turn, explains the different RT  
466 patterns that are induced by different foreperiod distributions.

467         Given this model, it is clear to see how sequential effects come about. Trials in which the  
468 previous foreperiod matches the current foreperiod would lead to a better preparation (more  
469 activation and less inhibition) at target onset, compared to trials where there is a mismatch. Trials  
470 whose previous foreperiod was longer than the current foreperiod would result in a high level of  
471 inhibition around target onset, thereby leading to a slower response. To explain the asymmetry in  
472 sequential effects of RT data, the multiple-trace theory postulates that the memory trace builds up  
473 and dissipates slowly over the trial. Thus, in trials whose previous foreperiod was shorter than the  
474 current foreperiod, the inhibitory content of the previous memory trace would dissipate by target  
475 onset, and thus would not contribute to the preparatory profile, meaning that RT would be  
476 relatively fast compared to the inverse scenario. Unlike other competing models, The formalized  
477 version of this model was shown to make quantitatively-correct predictions of various temporal  
478 phenomena, including the sequential effect (Salet et al., 2022).

479         Can the multiple trace model explain the results observed in our study? Like its  
480 predecessor, the trace conditioning model, this model places great importance on the role of  
481 inhibition in building up expectations. The findings from this and previous studies on oculomotor  
482 inhibition fit with this view – as inhibition builds up to the expected target, saccade rates are  
483 lowered, with inhibition being released after target onset. This interpretation fits with the results  
484 observed in Exp. 1, with saccade probability being lower when the foreperiod of the previous and  
485 current trials matched as compared to where the previous trial was longer in duration (see **Figure**  
486 **2B**, negative vs. zero value). The observed asymmetry in pre-stimulus oculomotor inhibition in  
487 Exp. 1 (**Figure 2B**, positive values) can also be explained by the model – in trials where the  
488 previous foreperiod was shorter than the current foreperiod, the inhibitory content of the previous  
489 memory trace dissipates by target onset, and therefore does not negatively affects expectation,  
490 which translates into relatively lower saccade rate. The increase in saccade rate observed for  
491 increasing positive SFDs (shorter previous trial) could likewise be accounted for by the dissipation  
492 of activation postulated by the model. Lastly, the observed difference in oculomotor inhibition for  
493 the uniform and inverse-U-shaped distributions can be explained by differences in the aggregated  
494 traces between the two distributions – there are fewer trials with an extreme foreperiod difference  
495 in the inverse-U-shaped distribution compared to the uniform distribution, meaning that

496 aggregated activity is predicted to be low at late time points during the trial in the inverse-U-shaped  
497 condition, and this translates into a higher saccade probability at extreme positive values as  
498 depicted in **Figure 2B**. Thus, of the presented alternatives, our results are best explained by the  
499 multiple trace theory.

## 500 **Conclusions**

501 Our results demonstrate that the pre-stimulus oculomotor inhibition is modulated by temporal  
502 information that stems from a recent experience. This study joins a growing body of studies that  
503 demonstrate that pre-stimulus oculomotor inhibition reflects different types of temporal  
504 expectation processes, based on rhythms (Dankner et al., 2017), cue associations (Abeles et al.,  
505 2020; Amit et al., 2019; Tal-Perry & Yuval-Greenberg, 2020, 2021) or hazard rate function (Tal-  
506 Perry & Yuval-Greenberg, 2020); with the degree of anticipation correlated with the degree of  
507 inhibition (Tal-Perry & Yuval-Greenberg, 2020). The present study expands this list by showing  
508 that anticipation based on local sequential information is similarly correlated with pre-stimulus  
509 oculomotor inhibition. Together, this series of studies demonstrate that whenever there is temporal  
510 anticipation, there is also inhibition of eye movements. This study additionally provides a metric  
511 to study sequential effects without requiring a response from the participant. This metric may allow  
512 studying the sequential effect in uncooperative populations, such as infants and toddlers. An open  
513 question that remains following this study is whether the oculomotor sequential effect depends on  
514 attention. Future studies could manipulate attention to the target and examine the effect of this  
515 manipulation on the oculomotor inhibition effect.

516 **Data Availability statement.** The datasets used in Exp. 1 and 2 and an R-markdown file that  
517 reproduces all the reported modeling, statistical analyses, and graphs within the paper are uploaded  
518 to the Open Science Foundation repository and are available at [doi.org/10.17605/OSF.IO/PV3N2](https://doi.org/10.17605/OSF.IO/PV3N2)

## 519 **References**

520 Abeles, D., Amit, R., Tal-Perry, N., Carrasco, M., & Yuval-Greenberg, S. (2020). Oculomotor  
521 inhibition precedes temporally expected auditory targets. *Nature Communications*, *11*(1),  
522 3524. <https://doi.org/10.1038/s41467-020-17158-9>

- 523 Alegria, J., & Delhaye-Rembaux, M. (1975). Sequential effects of foreperiod duration and  
524 conditional probability of the signal in a choice reaction time task. *Acta Psychologica*,  
525 39(5), 321–328. [https://doi.org/10.1016/0001-6918\(75\)90024-4](https://doi.org/10.1016/0001-6918(75)90024-4)
- 526 Amit, R., Abeles, D., Carrasco, M., & Yuval-Greenberg, S. (2019). Oculomotor inhibition  
527 reflects temporal expectations. *NeuroImage*, 184(March 2018), 279–292.  
528 <https://doi.org/10.1016/j.neuroimage.2018.09.026>
- 529 Badde, S., Myers, C. F., Yuval-Greenberg, S., & Carrasco, M. (2020). Oculomotor freezing  
530 reflects tactile temporal expectation and aids tactile perception. *Nature Communications*,  
531 11(1), 1–9. <https://doi.org/10.1038/s41467-020-17160-1>
- 532 Bates, D., Kliegl, R., Vasishth, S., & Baayen, H. R. (2015). Parsimonious Mixed Models. *ArXiv*.  
533 <http://arxiv.org/abs/1506.04967>
- 534 Bates, D., Mächler, M., Bolker, B., & Walker, S. (2015). Fitting Linear Mixed-Effects Models  
535 Using {lme4}. *Journal of Statistical Software*, 67(1), 1–48.  
536 <https://doi.org/10.18637/jss.v067.i01>
- 537 Brainard, D. H. (1997). The Psychophysics Toolbox. *Spatial Vision*, 10, 433–436.  
538 <https://doi.org/10.1163/156856897x00357>
- 539 Capizzi, M., Correa, Á., Wojtowicz, A., & Rafal, R. D. (2015). Foreperiod priming in temporal  
540 preparation: Testing current models of sequential effects. *Cognition*, 134, 39–49.  
541 <https://doi.org/10.1016/j.cognition.2014.09.002>
- 542 Coull, J. T., Frith, C. D., Büchel, C., & Nobre, A. C. (2000). Orienting attention in time:  
543 Behavioural and neuroanatomical distinction between exogenous and endogenous shifts.  
544 *Neuropsychologia*, 38(6), 808–819. [https://doi.org/10.1016/S0028-3932\(99\)00132-3](https://doi.org/10.1016/S0028-3932(99)00132-3)

- 545 Cousineau, D., & O'Brien, F. (2014). Error bars in within-subject designs: A comment on  
546 Baguley (2012). *Behavior Research Methods*, 46(4), 1149–1151.  
547 <https://doi.org/10.3758/s13428-013-0441-z>
- 548 Dankner, Y., Shalev, L., Carrasco, M., & Yuval-Greenberg, S. (2017). Prestimulus Inhibition of  
549 Saccades in Adults With and Without Attention-Deficit / Hyperactivity Disorder as an  
550 Index of Temporal Expectations. *Psychological Science*, 28(7), 835–850.  
551 <https://doi.org/10.1177/0956797617694863>
- 552 Duque, J., & Ivry, R. B. (2009). Role of corticospinal suppression during motor preparation.  
553 *Cerebral Cortex*, 19(9), 2013–2024. <https://doi.org/10.1093/cercor/bhn230>
- 554 Engbert, R., & Kliegl, R. (2003). Microsaccades uncover the orientation of covert attention.  
555 *Vision Research*, 43(9), 1035–1045. [https://doi.org/10.1016/s0042-6989\(03\)00084-1](https://doi.org/10.1016/s0042-6989(03)00084-1)
- 556 Engbert, R., & Mergenthaler, K. (2006). Microsaccades are triggered by low retinal image slip.  
557 *Proceedings of the National Academy of Sciences of the USA*, 103(18), 3–8.  
558 <https://doi.org/10.1073/pnas.0509557103>
- 559 Fox, J. (2016). Applied regression analysis & generalized linear models. In *Sage*.  
560 <https://doi.org/10.1017/CBO9781107415324.004>
- 561 Greenhouse, I., Sias, A., Labruna, L., & Ivry, R. B. (2015). Nonspecific inhibition of the motor  
562 system during response preparation. *Journal of Neuroscience*, 35(30), 10675–10684.  
563 <https://doi.org/10.1523/JNEUROSCI.1436-15.2015>
- 564 Hershman, R., Henik, A., & Cohen, N. (2018). A novel blink detection method based on  
565 pupillometry noise. *Behavior Research Methods*, 50(1), 107–114.  
566 <https://doi.org/10.3758/s13428-017-1008-1>

- 567 Los, S. A. (2010). Foreperiod and sequential effects: Theory and data. In *Attention and Time* (pp.  
568 289–302). Oxford University Press.
- 569 Los, S. A. (2013). The role of response inhibition in temporal preparation: Evidence from a  
570 go/no-go task. *Cognition*, *129*(2), 328–344.  
571 <https://doi.org/10.1016/j.cognition.2013.07.013>
- 572 Los, S. A., & Agter, F. (2005). Reweighting sequential effects across different distributions of  
573 foreperiods: Segregating elementary contributions to nonspecific preparation. *Perception*  
574 *and Psychophysics*, *67*(7), 1161–1170. <https://doi.org/10.3758/BF03193549>
- 575 Los, S. A., & Heslenfeld, D. J. (2005). Intentional and Unintentional Contributions to  
576 Nonspecific Preparation: Electrophysiological Evidence. *Journal of Experimental*  
577 *Psychology: General*, *134*(1), 52–72. <https://doi.org/10.1037/0096-3445.134.1.52>
- 578 Los, S. A., Knol, D. L., & Boers, R. M. (2001). The foreperiod effect revisited: Conditioning as a  
579 basis for nonspecific preparation. *Acta Psychologica*, *106*(1), 121–145.  
580 [https://doi.org/10.1016/S0001-6918\(00\)00029-9](https://doi.org/10.1016/S0001-6918(00)00029-9)
- 581 Los, S. A., Kruijne, W., & Meeter, M. (2014). Outlines of a multiple trace theory of temporal  
582 preparation. *Frontiers in Psychology*, *5*(September), 1–13.  
583 <https://doi.org/10.3389/fpsyg.2014.01058>
- 584 Los, S. A., Kruijne, W., & Meeter, M. (2017). Hazard versus history: Temporal preparation is  
585 driven by past experience. *Journal of Experimental Psychology: Human Perception and*  
586 *Performance*, *43*(1), 78–88. <https://doi.org/10.1037/xhp0000279>
- 587 Los, S. A., Nieuwenstein, J., Bouharab, A., Stephens, D. J., Meeter, M., & Kruijne, W. (2021).  
588 The warning stimulus as retrieval cue: The role of associative memory in temporal



- 589 preparation. *Cognitive Psychology*, 125(April 2019), 101378.
- 590 <https://doi.org/10.1016/j.cogpsych.2021.101378>
- 591 Lüdecke, D., Makowski, D., & Waggoner, P. (2020). *performance: Assessment of Regression*
- 592 *Models Performance*. <https://cran.r-project.org/package=performance>
- 593 Martinez-Conde, S., Macknik, S. L., & Hubel, D. H. (2004). The role of fixational eye
- 594 movements in visual perception. *Nature Reviews. Neuroscience*, 5(3), 229–240.
- 595 <https://doi.org/10.1038/nrn1348>
- 596 Martinez-Conde, S., Macknik, S. L., Troncoso, X. G., & Hubel, D. H. (2009). Microsaccades: A
- 597 neurophysiological analysis. *Trends in Neurosciences*, 32(9), 463–475.
- 598 <https://doi.org/10.1016/j.tins.2009.05.006>
- 599 Matuschek, H., Kliegl, R., Vasishth, S., Baayen, H. R., & Bates, D. (2017). Balancing Type I
- 600 error and power in linear mixed models. *Journal of Memory and Language*, 94, 305–315.
- 601 <https://doi.org/10.1016/j.jml.2017.01.001>
- 602 Miniussi, C., Wilding, E. L., Coull, J. T., & Nobre, A. C. (1999). Orienting attention in time.
- 603 Modulation of brain potentials. *Brain*, 122, 1507–1518.
- 604 <https://doi.org/10.1093/brain/122.8.1507>
- 605 Morey, R. D., & Rouder, J. N. (2018). *BayesFactor: Computation of Bayes Factors for Common*
- 606 *Designs* [Computer software]. <https://cran.r-project.org/package=BayesFactor>
- 607 Narayanan, N. S., Horst, N. K., & Laubach, M. (2006). Reversible inactivations of rat medial
- 608 prefrontal cortex impair the ability to wait for a stimulus. *Neuroscience*, 139(3), 865–876.
- 609 <https://doi.org/10.1016/j.neuroscience.2005.11.072>
- 610 Niemi, P., & Näätänen, R. (1981). Foreperiod and simple reaction time. *Psychological Bulletin*.
- 611 <https://doi.org/10.1037/0033-2909.89.1.133>

- 612 Nobre, A. C., & van Ede, F. (2018). Anticipated moments: Temporal structure in attention.  
613 *Nature Reviews Neuroscience*, 19(1), 34–48. <https://doi.org/10.1038/nrn.2017.141>
- 614 Otero-Millan, J., Macknik, S. L., Langston, R. E., & Martinez-Conde, S. (2013). An oculomotor  
615 continuum from exploration to fixation. *Proceedings of the National Academy of*  
616 *Sciences of the United States of America*, 110(15), 6175–6180.  
617 <https://doi.org/10.1073/pnas.1222715110>
- 618 Otero-Millan, J., Troncoso, X. G., Macknik, S. L., Serrano-pedraza, I., & Martinez-conde, S.  
619 (2008). Saccades and microsaccades during visual fixation, exploration, and search:  
620 Foundations for a common saccadic generator. *Journal of Vision*, 8(14), 1–18.  
621 <https://doi.org/10.1167/8.14.21.Introduction>
- 622 Possamai, C. A., Granjon, M., Requin, J., & Reynard, G. (1973). Sequential effects related to  
623 foreperiod duration in simple reaction time. *Perceptual and Motor Skills*, 36(3 (II)),  
624 1185–1186. <https://doi.org/10.2466/pms.1973.36.3c.1185>
- 625 Prut, Y., & Fetz, E. E. (1999). Primate spinal interneurons show pre-movement instructed delay  
626 activity. *Nature*, 401(6753), Article 6753. <https://doi.org/10.1038/44145>
- 627 R Core Team. (2018). *R: A Language and Environment for Statistical Computing*. R Foundation  
628 for Statistical Computing. <https://www.r-project.org/>
- 629 Salet, J. M., Kruijne, W., van Rijn, H., Los, S. A., & Meeter, M. (2022). FMTP: A unifying  
630 computational framework of temporal preparation across time scales. *Psychological*  
631 *Review*, 129(5), 911–948. <https://doi.org/10.1037/rev0000356>
- 632 Stampe, D. M. (1993). Heuristic filtering and reliable calibration methods for video-based pupil-  
633 tracking systems. *Behavior Research Methods, Instruments, & Computers*, 25(2), 137–  
634 142. <https://doi.org/10.3758/BF03204486>

- 635 Steinborn, M. B., & Langner, R. (2012). Arousal modulates temporal preparation under  
636 increased time uncertainty: Evidence from higher-order sequential foreperiod effects.  
637 *Acta Psychologica, 139*(1), 65–76. <https://doi.org/10.1016/j.actpsy.2011.10.010>
- 638 Tal-Perry, N., & Yuval-Greenberg, S. (2020). Pre-target oculomotor inhibition reflects temporal  
639 orienting rather than certainty. *Scientific Reports, 10*(1), 1–9.  
640 <https://doi.org/10.1038/s41598-020-78189-2>
- 641 Tal-Perry, N., & Yuval-Greenberg, S. (2021). Prestimulus inhibition of eye movements reflects  
642 temporal expectation rather than time estimation. *Attention, Perception, &*  
643 *Psychophysics, 1–13*. <https://doi.org/10.3758/s13414-021-02319-9>
- 644 Tal-Perry, N., & Yuval-Greenberg, S. (2022). The Spatiotemporal Link of Temporal  
645 Expectations: Contextual Temporal Expectation Is Independent of Spatial Attention. *The*  
646 *Journal of Neuroscience, 42*(12), 2516–2523. [https://doi.org/10.1523/jneurosci.1555-](https://doi.org/10.1523/jneurosci.1555-21.2022)  
647 [21.2022](https://doi.org/10.1523/jneurosci.1555-21.2022)
- 648 Vallesi, A. (2010). Neuroanatomical substrates of foreperiod effects. In A. C. Nobre & J. T.  
649 Coull (Eds.), *Attention and Time* (p. 0). Oxford University Press.  
650 <https://doi.org/10.1093/acprof:oso/9780199563456.003.0022>
- 651 Vallesi, A., Lozano, V. N., & Correa, Á. (2013). Dissociating temporal preparation processes as  
652 a function of the inter-trial interval duration. *Cognition, 127*(1), 22–30.  
653 <https://doi.org/10.1016/j.cognition.2012.11.011>
- 654 Vallesi, A., & Shallice, T. (2007). Developmental Dissociations of Preparation Over Time:  
655 Deconstructing the Variable Foreperiod Phenomena. *Journal of Experimental*  
656 *Psychology: Human Perception and Performance, 33*(6), 1377–1388.  
657 <https://doi.org/10.1037/0096-1523.33.6.1377>

- 658 Vallesi, A., Shallice, T., & Walsh, V. (2007). Role of the prefrontal cortex in the foreperiod  
659 effect: TMS evidence for dual mechanisms in temporal preparation. *Cerebral Cortex*,  
660 *17*(2), 466–474. <https://doi.org/10.1093/cercor/bhj163>
- 661 Wagenmakers, E. J. (2007). A practical solution to the pervasive problems of p values.  
662 *Psychonomic Bulletin and Review*, *14*(5), 779–804. <https://doi.org/10.3758/BF03194105>
- 663 Zuber, B. L., Stark, L., & Cook, G. (1965). Microsaccades and the velocity-amplitude  
664 relationship for saccadic eye movements. *Science*, *150*(702), 1459–1460.  
665 <https://doi.org/10.1126/science.150.3702.1459>
- 666
